# Supplementary material for: The ETS Inhibitor YK-4-279 Suppresses Thyroid Cancer Progression Independent of TERT Promoter Mutations
Source: PubMed Central journal article supplement (PMC8242932; doi:10.3389/fonc.2021.649323), 2021-06-16
Supplement: DataSheet_1.pdf [file DataSheet_1.pdf]

## Supplementary Figure 1

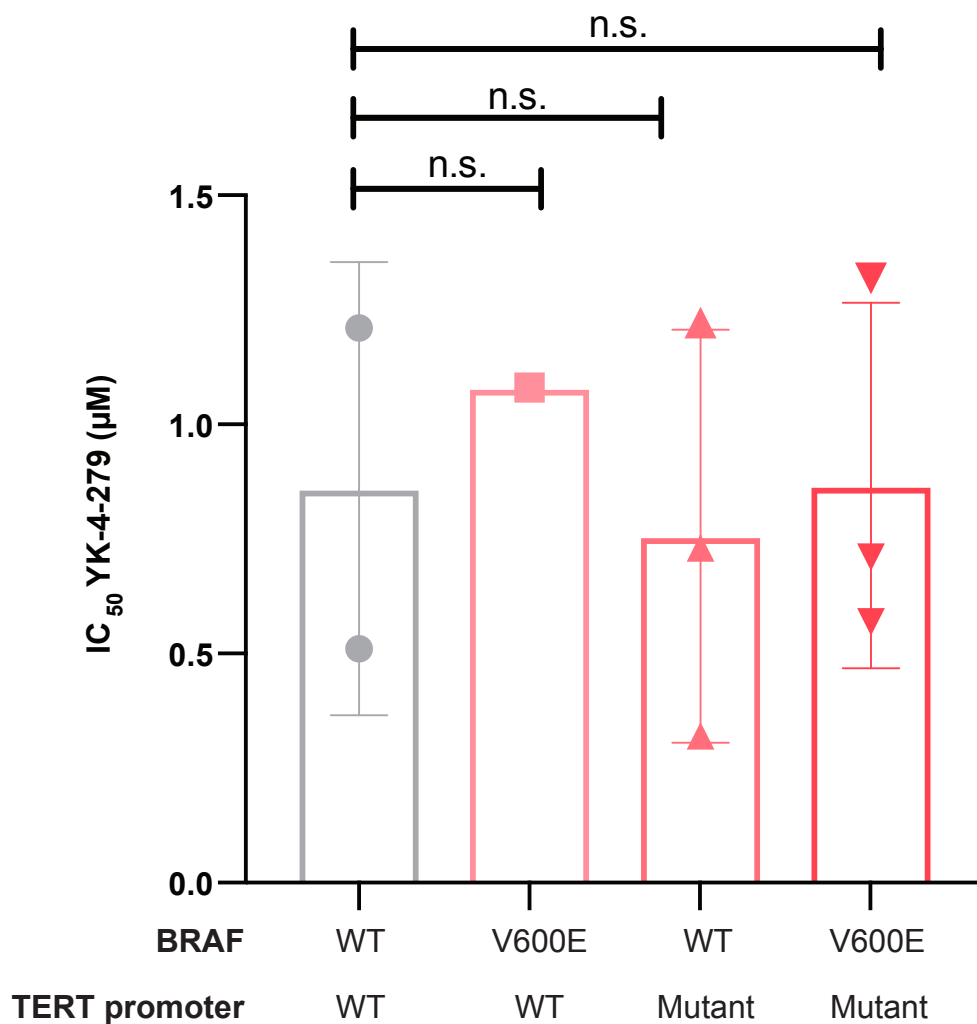

**Supplementary Figure 1.** Comparison of IC<sub>50</sub>s between different groups of thyroid cancer cell lines. n.s., not significant.

## Supplementary Figure 2

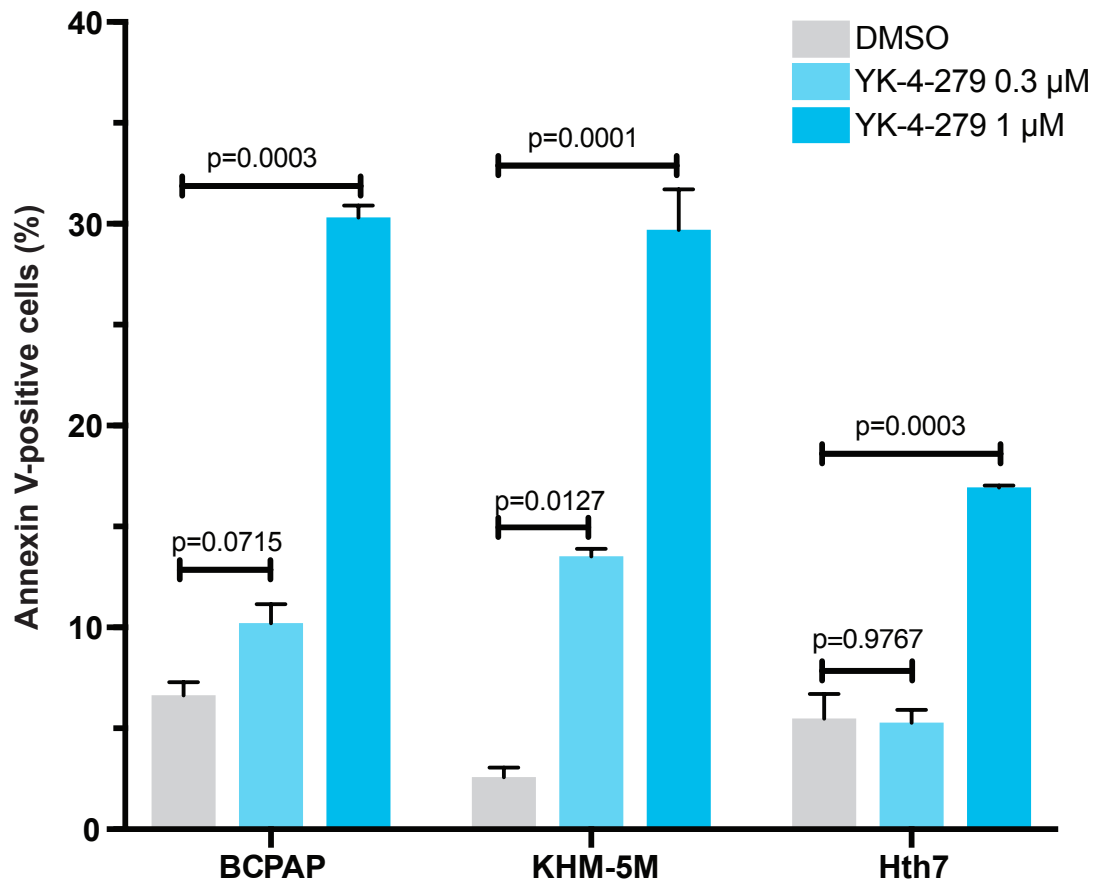

**Supplementary Figure 2.** The percentage of Annexin V-positive cells after treatment with YK-4-279. All the values represent the average  $\pm$  standard deviation (SD) of triplicate samples from a typical experiment. P values were calculated by two-tailed Student's t test. Similar results were obtained in two additional independent experiments.

## Supplementary Figure 3

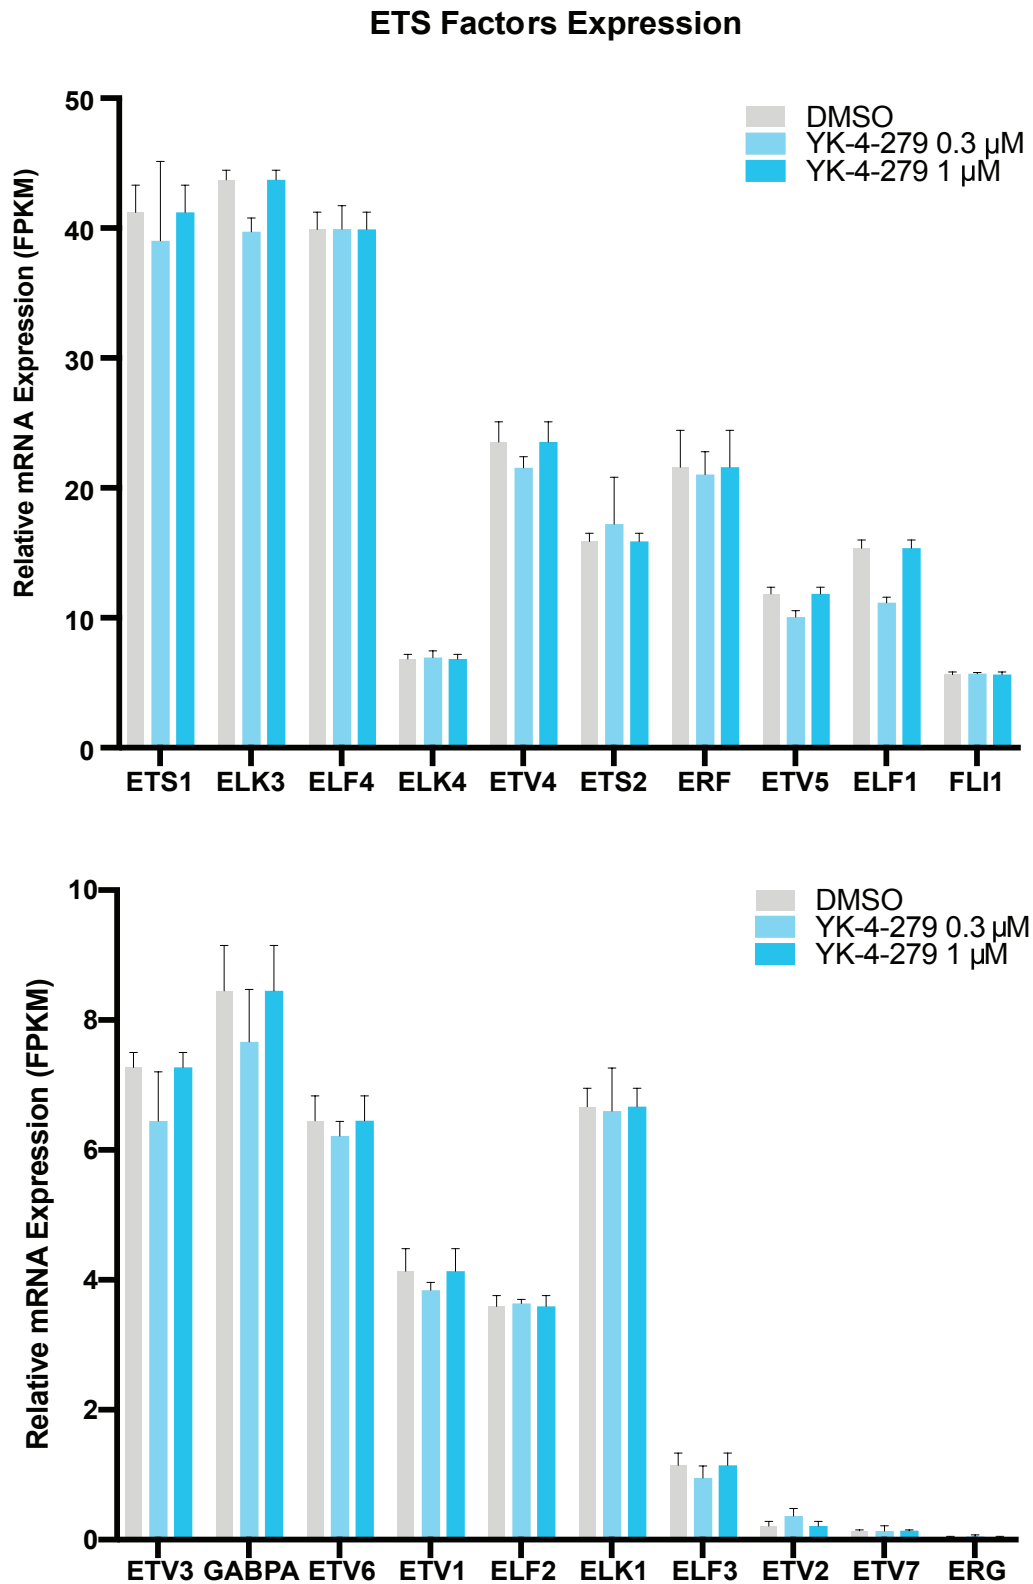

**Supplementary Figure 3.** The expression of each ETS transcription factors in KHM-5M cells after YK-4-279 treatment. All the values represent the average  $\pm$  standard deviation (SD) of triplicate samples.
